# Supplementary material for: Nontrivial spectral band progressions in electronic circular dichroism spectra of carbohelicenes revealed by linear response calculations
Source: Royal Society of Chemistry journal article supplement (doi:10.1039/d2cp02371g), 2022-01-01
Supplement: d2cp02371g1.pdf [file d2cp02371g1.pdf]

*Supplementary information for:*

**Nontrivial spectral band progressions in electronic circular dichroism spectra of  
carbohelicenes revealed by linear response calculations**

Manuel Brand<sup>a)</sup> and Patrick Norman<sup>b)</sup>

*Department of Theoretical Chemistry and Biology, School of  
Engineering Sciences in Chemistry, Biotechnology and Health,  
KTH Royal Institute of Technology, SE-106 91 Stockholm,  
Sweden*

---

<sup>a)</sup>Electronic mail: manuelbr@kth.se

<sup>b)</sup>Electronic mail: panor@kth.se

## CALCULATED CD SPECTRA

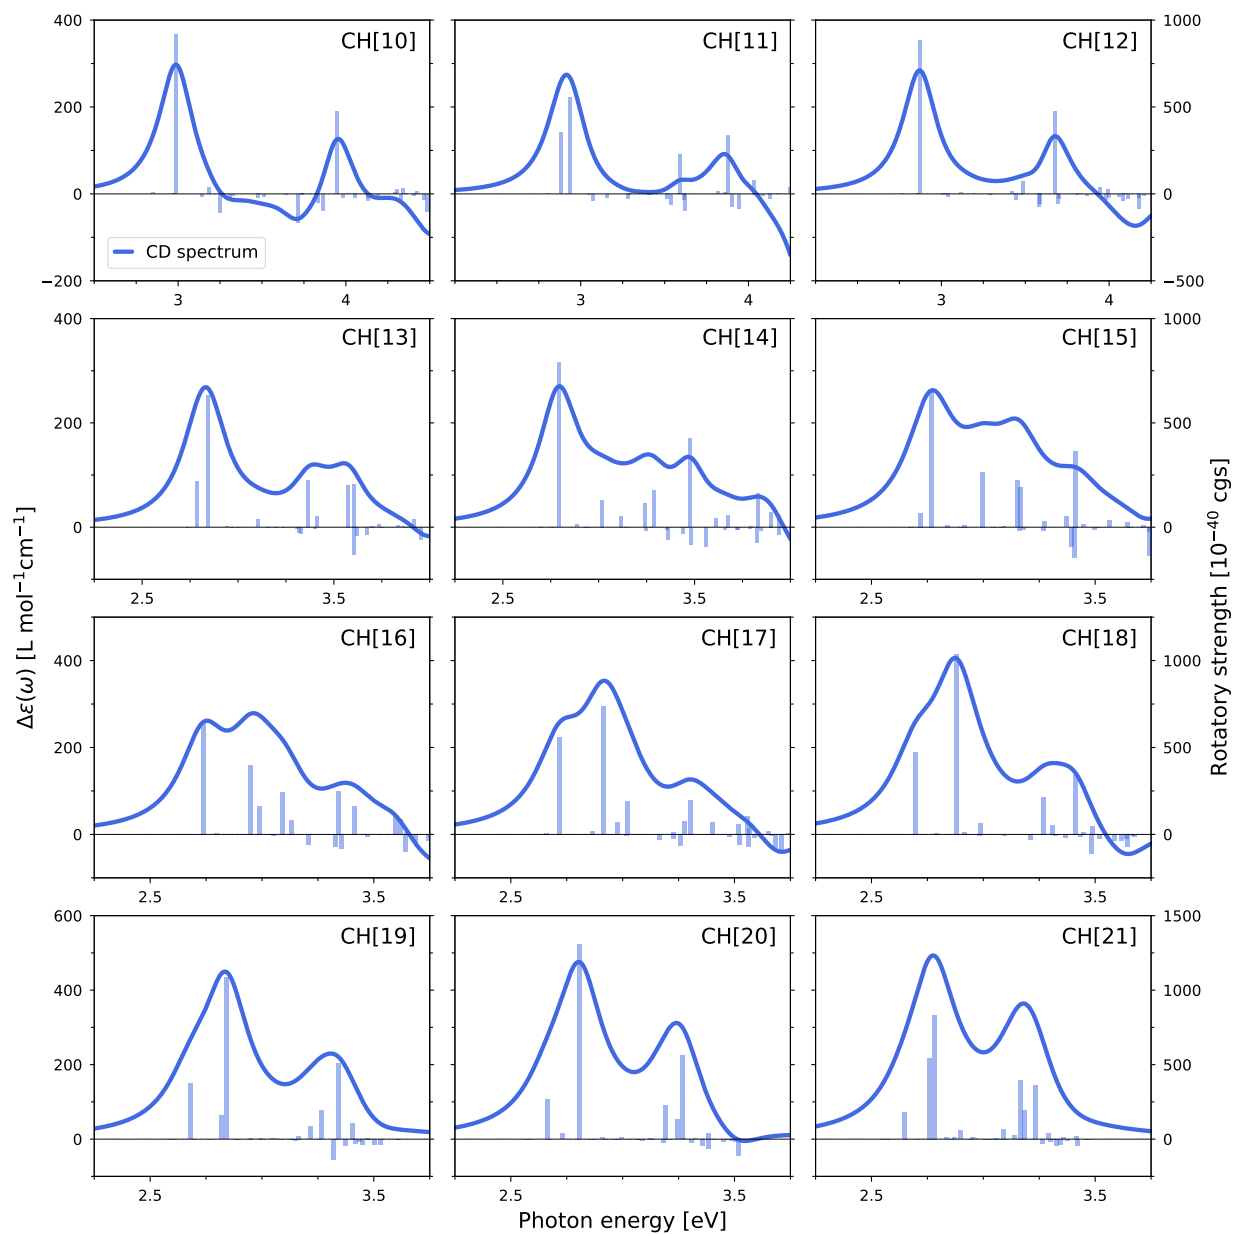

S1. CD spectra of CH[10]-CH[21]. Bars indicate the rotatory strengths of the lowest 40 excited states.

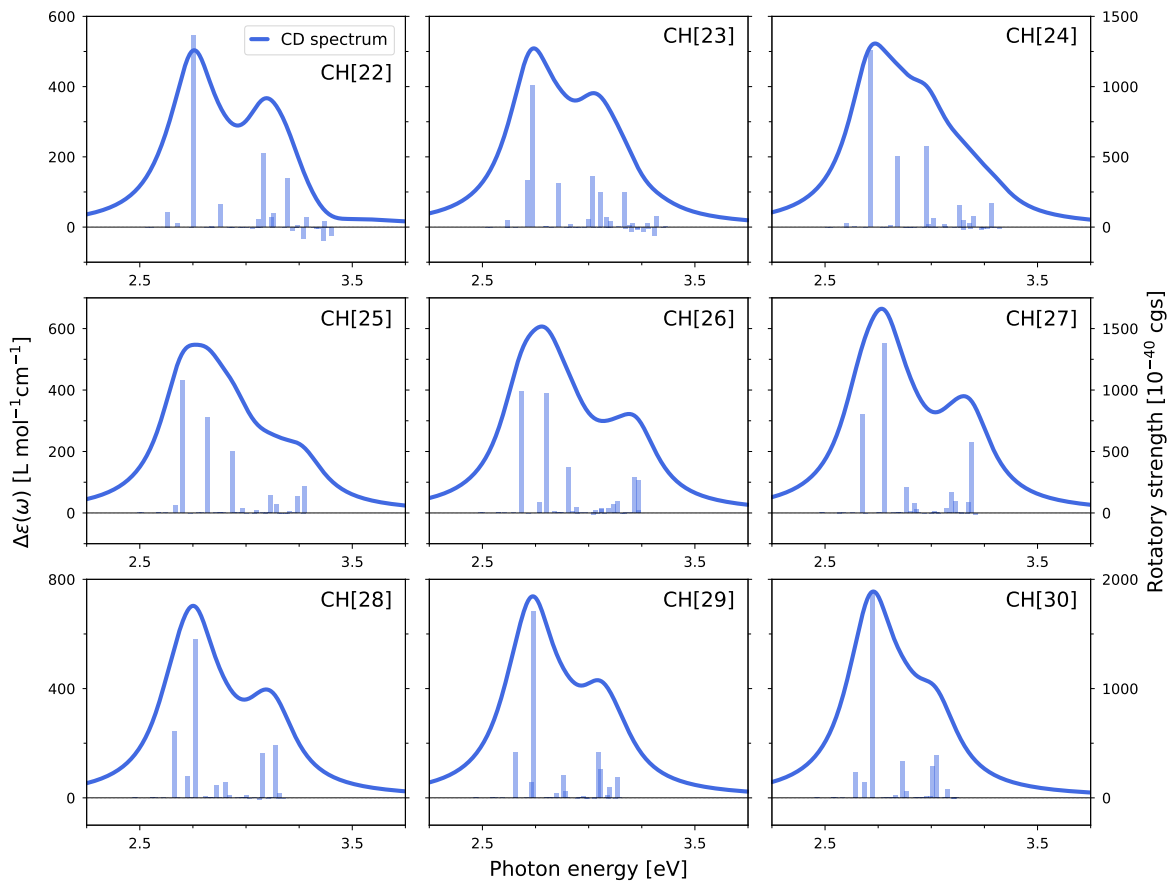

S2. CD spectra of CH[22]-CH[30]. Bars indicate the rotatory strengths of the lowest 40 excited states.

## COMPARISON WITH CPP APPROACH

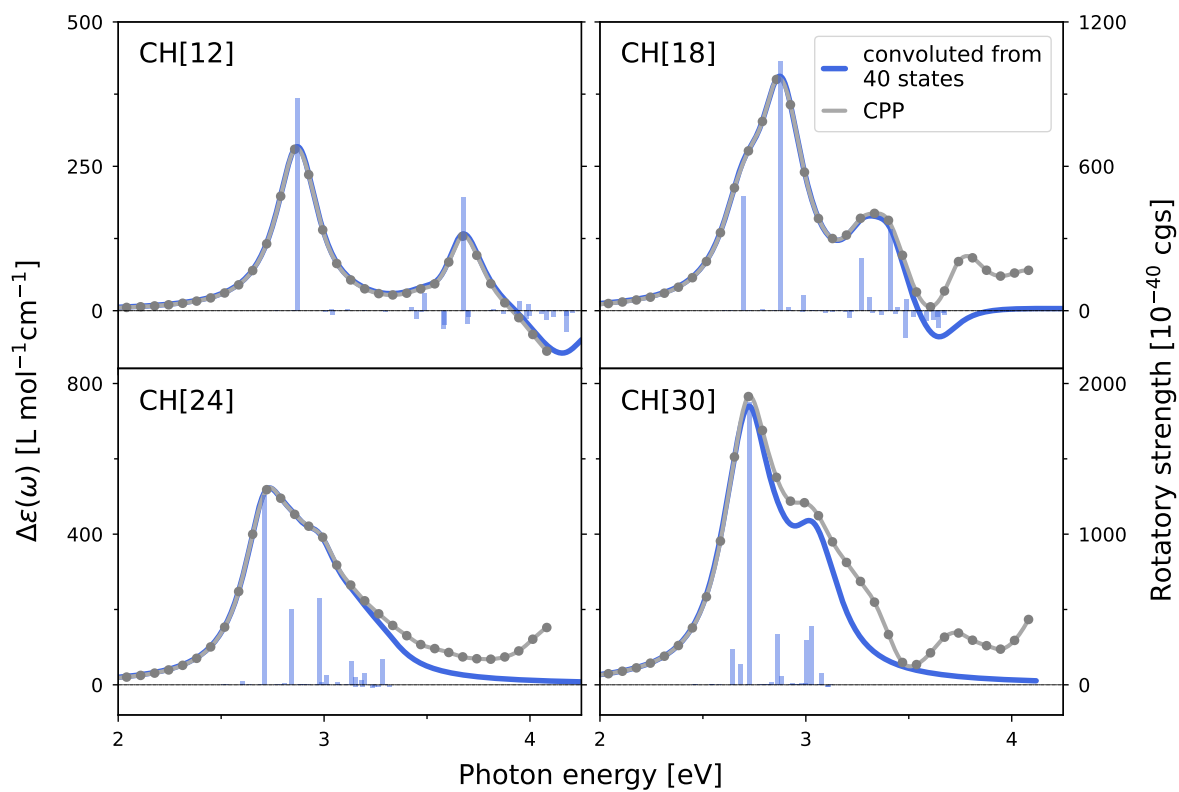

S3. Comparison between spectra obtained by broadening of 40 excited states and the CPP approach for selected carbohelicenes. The CPP response functions were evaluated between 1.9 and 4.0 eV in steps of 0.7 eV.
